# Supplementary material for: Quantitative Proteomics of Synaptosomal Fractions in a Rat Overexpressing Human DISC1 Gene Indicates Profound Synaptic Dysregulation in the Dorsal Striatum
Source: PubMed Central journal article supplement (PMC5808171; doi:10.3389/fnmol.2018.00026), 2018-02-06
Supplement: Data_Sheet_1.pdf [file Data_Sheet_1.pdf]

## *Supplementary Material*

# **Quantitative proteomics of synaptosomal fractions in a rat overexpressing human DISC1 gene indicates profound synaptic dysregulation in the dorsal striatum**

**Fernando J. Sialana,<sup>1</sup> An-Li Wang,<sup>2</sup> Benedetta Fazari,<sup>2</sup> Roman Smidak,<sup>1</sup> Svenja V. Trossbach,<sup>3</sup> Carsten Korth,<sup>3</sup> Joseph P. Huston,<sup>2</sup> Maria A. de Souza Silva,<sup>2\*</sup> and Gert Lubec<sup>4\*</sup>**

\* **Correspondence:** G.L. ([gert.lubec@lubeclab.com](mailto:gert.lubec@lubeclab.com)) and M.A.d.S.S. ([desouza@hhu.de](mailto:desouza@hhu.de))

### **1 Supplementary Data (xlsx files)**

Supplementary Data 1. Label free quantification of the biochemical fractions of tgDISC1 rats.

Supplementary Data 2. Protein and peptide identifications data for TMT10plex.

Supplementary Data 3. Quantitative proteomics data of synaptosomal fractions of tgDISC1 and wild type rats in the dorsal striatum by TMT10plex.

### **2 Supplementary Figures and Tables**

**Supplementary Figure S1.** Experimental Workflow. Synaptosomal fractions from bilateral regions were prepared for individual animals (for tgDISC1 and wild type; n=10 each). Synaptosomes were digested with a Trypsin-LysC enzyme mixture using the filter-aided sample preparation (FASP). The peptides were labeled with TMT 10-plex isobaric labels and fractionated by ion-pair reversed-phase chromatography at pH 10. Fractions were analysed by liquid chromatography tandem mass spectrometry using a Q-Exactive Plus. Database searching was performed with search engines against the rat SwissProt protein database. Functional enrichment analyses were performed using ClueGO and Inguinity Pathway analyses (IPA).

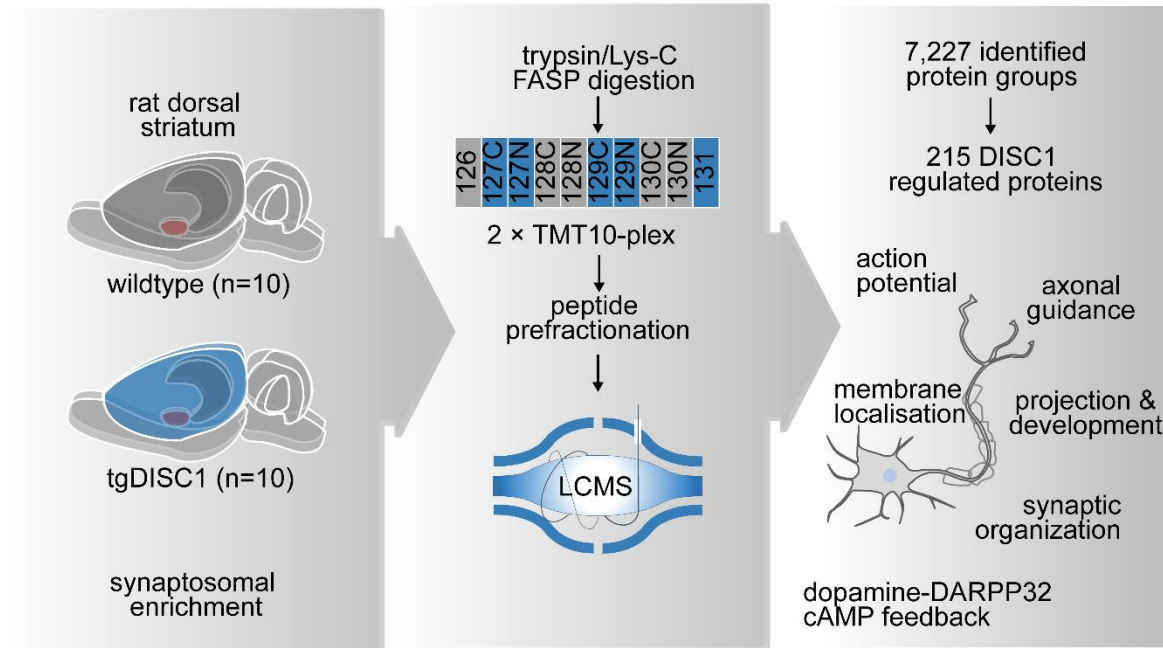

**Supplementary Figure S2.** Proteomic profile of the striatal synaptosomal fractions. Synaptosomal fractions were prepared using a microscale discontinuous sucrose gradient and collected at the 1.25/1.0 M sucrose interface. Immunoblot of representative proteins for the following biochemical fractionation stages: (1) whole dorsal striatum, (2) cytosolic (3) synaptosomes at 1.25/1.0M sucrose interface (4) below 1.25M sucrose (5) above 1.0M sucrose. The presynaptic (VGLU1, SYP) and postsynaptic (GRIN1 and PSD95) protein markers are enriched in the synaptosomal fractions. The cytosolic protein GAPDH is depleted in the synaptosomal fraction.

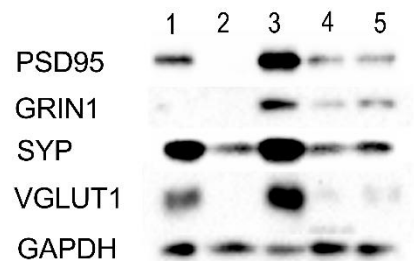

**Supplementary Figure S3.** Immunoblot of DISC1, DAT1 and NMDAR1 proteins (A-C) of the synaptosomal fractions of tgDISC1 and wild type rat. Total protein stain was used as loading control (D). Values represent  $*p < .05$ ,  $**p < .01$ ,  $***p < .001$  compared using two-sided *T*-tests. Outliers (blue arrows) are identified using Grubb's test.

A. DISC1

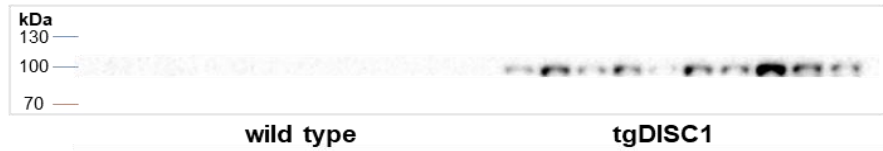

B. DAT1/SLC6A3

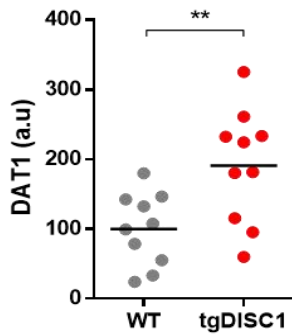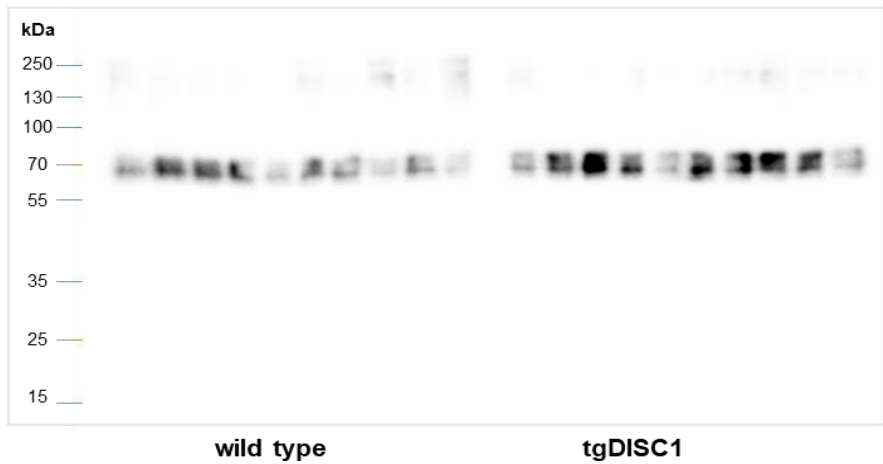

C. NMDAR1/GRIN1

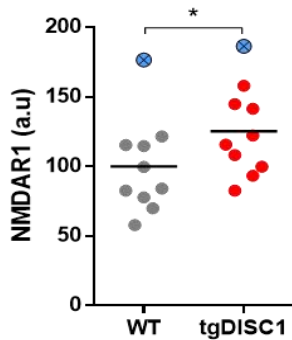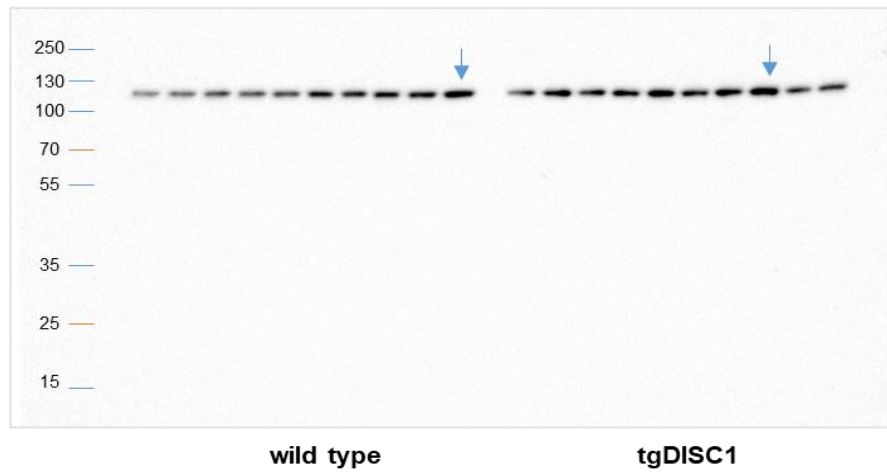

D. Loading control

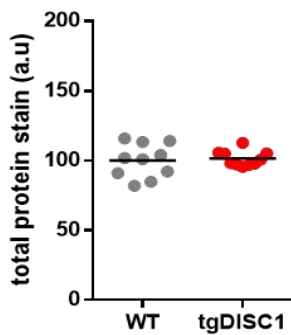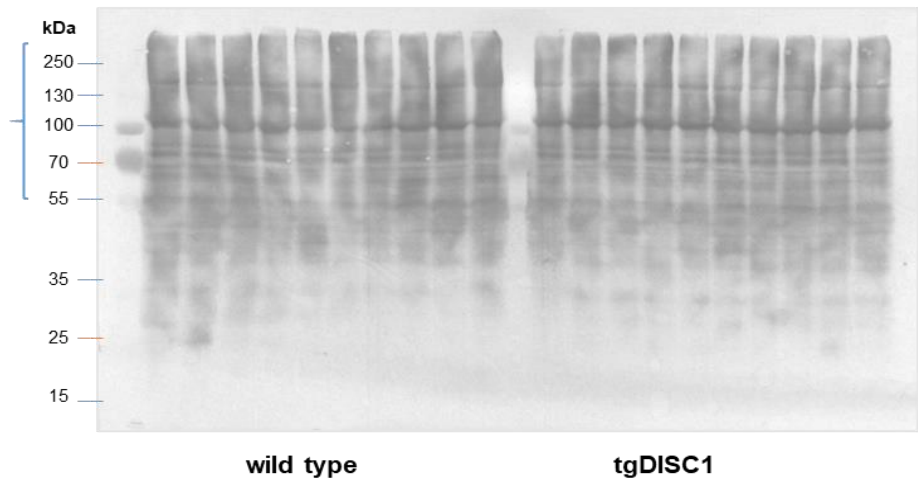

**Supplementary Figure S4.** Distribution of cellular (A) and synaptic components (B) of the DISC1-regulated proteins

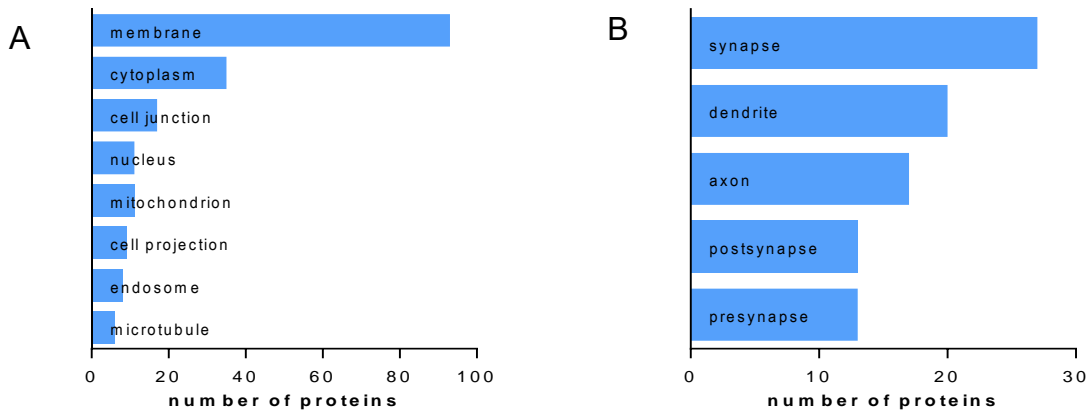

**Supplementary Figure S5.** Graphical representation of the biological processes of DISC1 regulated proteins (this study) and previously reported DISC1 interactors. Functionally related processes are clustered into networks using ClueGO and illustrated in different colors.

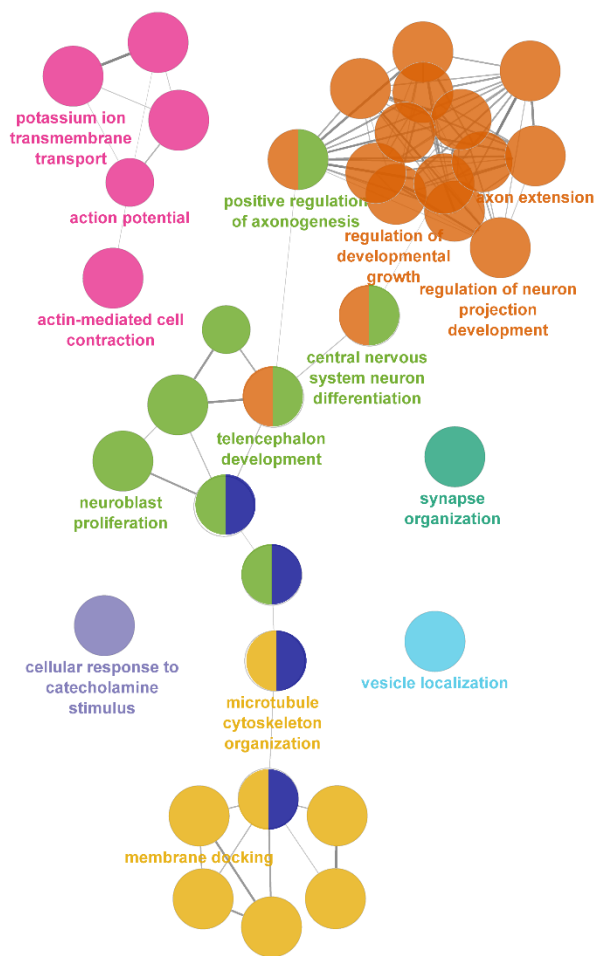

|                                                      |                                                                       |
|------------------------------------------------------|-----------------------------------------------------------------------|
| DISC1 regulated, this study                          | multicellular organismal signaling                                    |
|                                                      | action potential                                                      |
|                                                      | actin-mediated cell contraction                                       |
|                                                      | potassium ion transmembrane transport                                 |
|                                                      | potassium ion transport                                               |
|                                                      | synapse organization                                                  |
|                                                      | regulation of developmental growth                                    |
|                                                      | developmental growth involved in morphogenesis                        |
|                                                      | positive regulation of developmental growth                           |
|                                                      | regulation of cell size                                               |
|                                                      | developmental cell growth                                             |
|                                                      | positive regulation of cell projection organization                   |
|                                                      | regulation of cell morphogenesis involved in differentiation          |
|                                                      | positive regulation of cell morphogenesis involved in differentiation |
| regulation of neuron projection development          |                                                                       |
| positive regulation of neuron projection development |                                                                       |
| axon extension                                       |                                                                       |
| positive regulation of axon extension                |                                                                       |
| regulation of axonogenesis                           |                                                                       |
| positive regulation of axonogenesis                  |                                                                       |
| overlap                                              | telencephalon development                                             |
|                                                      | central nervous system neuron differentiation                         |
|                                                      | central nervous system neuron differentiation                         |
|                                                      | telencephalon development                                             |
| neuroblast proliferation                             |                                                                       |
| DISC1 interactome, previously reported               | neural precursor cell proliferation                                   |
|                                                      | regulation of microtubule-based process                               |
|                                                      | pallium development                                                   |
|                                                      | cerebral cortex development                                           |
|                                                      | positive regulation of axonogenesis                                   |
|                                                      | vesicle localization                                                  |
|                                                      | cellular response to catecholamine stimulus                           |
|                                                      | neural precursor cell proliferation                                   |
|                                                      | regulation of microtubule-based process                               |
|                                                      | microtubule cytoskeleton organization                                 |
|                                                      | cilium assembly                                                       |
|                                                      | membrane docking                                                      |
|                                                      | microtubule cytoskeleton organization                                 |
|                                                      | cytoskeleton-dependent intracellular transport                        |
| cell cycle G2/M phase transition                     |                                                                       |
| transport along microtubule                          |                                                                       |
| cilium assembly                                      |                                                                       |
| ciliary basal body docking                           |                                                                       |

**Supplementary Figure S6.** Integrated canonical pathways of the DISC1-regulated proteins. Significantly enriched canonical pathways ( $P < 10^{-3}$ ) in tgDISC1 in the dorsal striatum using Ingenuity Pathway Analyses. The network in the compartments “membrane” and “cytoplasm” is illustrated. Proteins up-regulated in tgDISC1 rats are colored in shades of red; proteins down-regulated are colored in green.

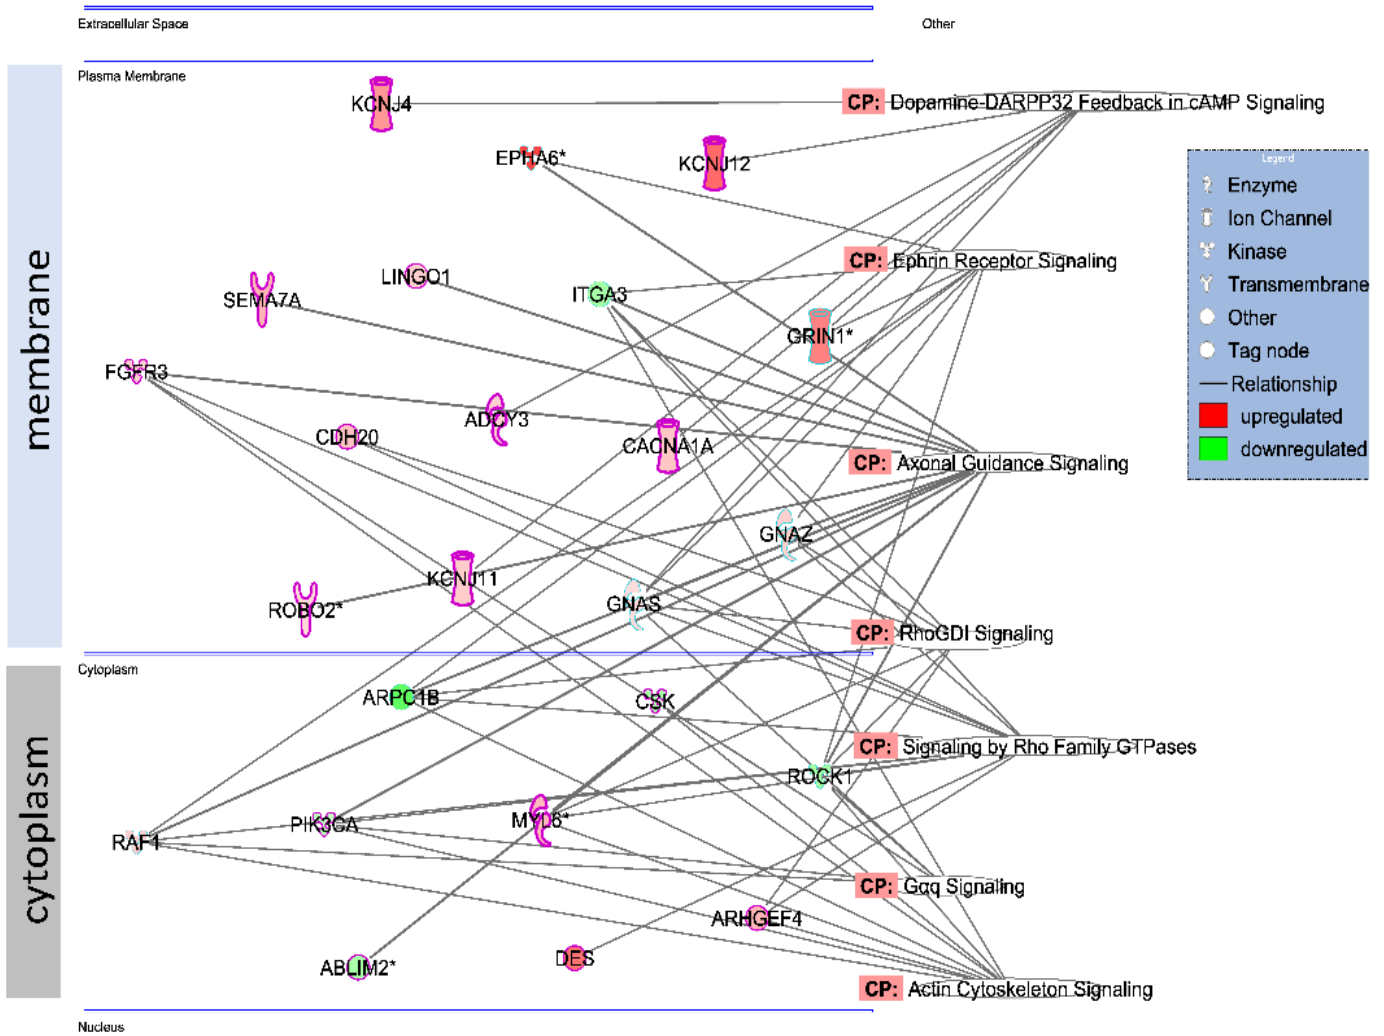

**Supplementary Figure S7.** DISC1–interactors altered in tgDISC1 rat as compared to the wild type animals. Values represent \* $p < .05$ , \*\* $p < .01$ , \*\*\* $p < .001$  compared using two-sided *T*-tests.

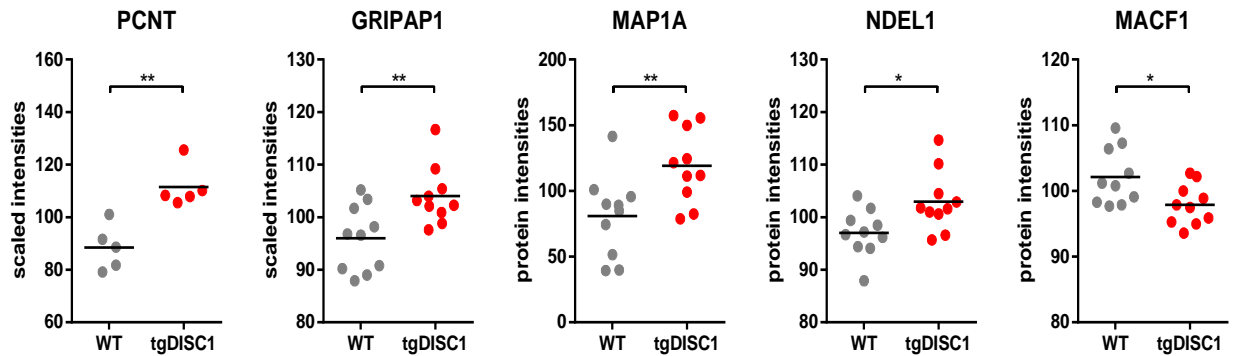

**Supplementary Figure S8.** Voltage-gated potassium channel complex proteins altered in tgDISC1 rat as compared to wild type animals. Values represent \* $p < .05$ , \*\* $p < .01$ , \*\*\* $p < .001$  compared using two-sided *T*-tests

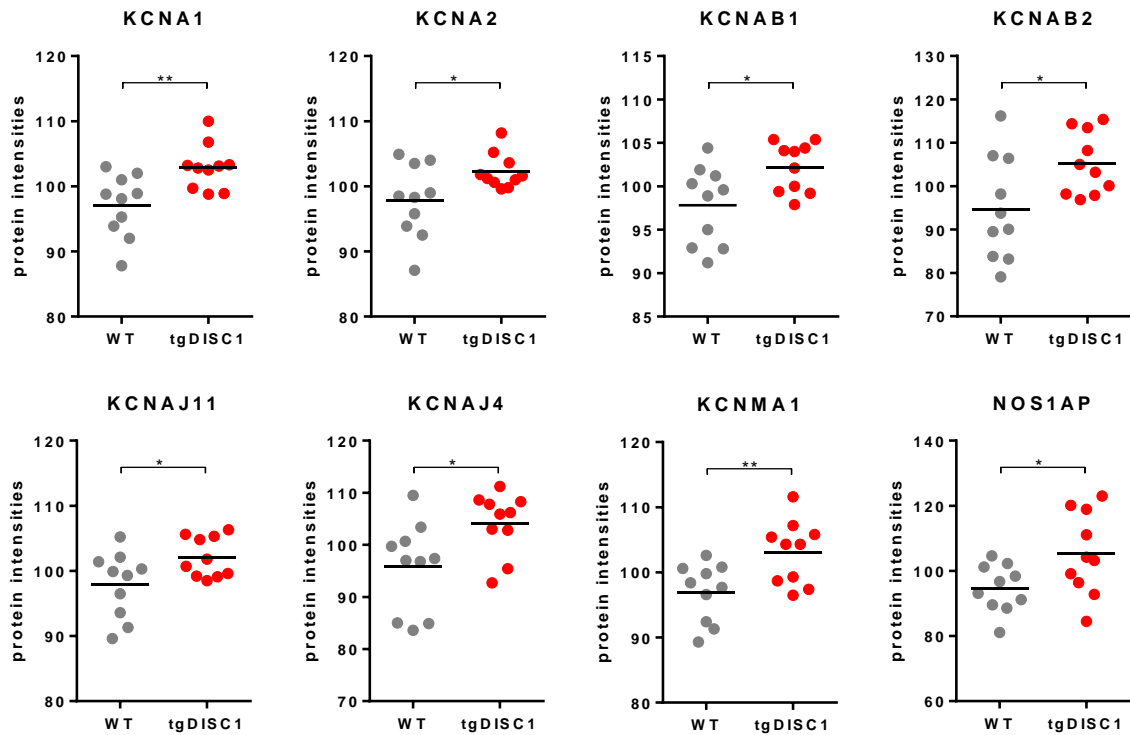

## 2.1 Supplementary Tables

**Supplementary Table S1.** Immunoblotting materials and conditions.

| Protein | Sample<br>( $\mu$ g) | Primary Antibodies        |          | Secondary Antibodies |          |
|---------|----------------------|---------------------------|----------|----------------------|----------|
|         |                      | Supplier, Cat #           | Dilution | Supplier, Cat #      | Dilution |
| PSD95   | 5                    | Synaptic Systems , 124011 | 1:1000   | Abcam, ab6728        | 1:20000  |
| SYP     | 5                    | Santa Cruz, sc-55507      | 1:5000   | Abcam, ab6728        | 1:40000  |
| NMDAR1  | 10                   | Abcam, ab32915            | 1:1000   | Abcam, ab6728        | 1:10000  |
| VGUT1   | 10                   | Synaptic Systems, 135311  | 1:1000   | Abcam, ab6728        | 1:10000  |
| GAPDH   | 10                   | Abcam, ab9485             | 1:2000   | Abcam, ab191866      | 1:10000  |
| DAT1    | 10                   | Abcam, ab111468           | 1:1000   | Abcam, ab191866      | 1:10000  |
| DISC1   | 10                   | Korth lab, 3D4            | 1:1000   | Abcam, ab6728        | 1:10000  |

**Supplementary Table S2.** Proteins statistically different between the tgDISC1 and wild type rats (Protein levels were considered statistically different between groups when  $P \leq 0.05$  using a two-sided T-test.

| Accession                                     | Protein                                                                         | P-value     |
|-----------------------------------------------|---------------------------------------------------------------------------------|-------------|
| <b><i>actin cytoskeleton organization</i></b> |                                                                                 |             |
| F1LMV9                                        | coronin 2B (CORO2B)                                                             | 1.4E-02 *   |
| P62024                                        | phosphatase and actin regulator 1 (PHACTR1)                                     | 2.8E-02 *   |
| <b><i>GPCR signaling</i></b>                  |                                                                                 |             |
| P43140                                        | adrenoceptor alpha 1A (ADRA1A)                                                  | 3.1E-02 *   |
| B4F7C1                                        | G protein-coupled receptor 37 like 1 (GPR37L1)                                  | 3.7E-02 *   |
| <b><i>axonal guidance signaling</i></b>       |                                                                                 |             |
| A0A0G2JTB5                                    | actin binding LIM protein family member 2 (ABLIM2)                              | 2.0E-02 *   |
| O88656                                        | actin related protein 2/3 complex subunit 1B (ARPC1B)                           | 4.5E-02 *   |
| F1LQK6                                        | EPH receptor A6 (EPHA6)                                                         | 2.2E-02 *   |
| A0A0G2K210                                    | fibroblast growth factor receptor 3 (FGFR3)                                     | 3.7E-02 *   |
| P19627                                        | G protein subunit alpha z (GNAZ)                                                | 3.3E-02 *   |
| D3ZHA7                                        | myosin light chain 6 (MYL6)                                                     | 2.8E-03 **  |
| A0A0G2K344                                    | phosphatidylinositol-4,5-bisphosphate 3-kinase catalytic subunit alpha (PIK3CA) | 4.0E-02 *   |
| P11345                                        | Raf-1 proto-oncogene, serine/threonine kinase (RAF1)                            | 1.9E-02 *   |
| D4A5S0                                        | Rho associated coiled-coil containing protein kinase 1 (ROCK1)                  | 3.8E-02 *   |
| <b><i>brain development</i></b>               |                                                                                 |             |
| A0A0G2JXE5                                    | ankyrin repeat and LEM domain containing 2 (ANKLE2)                             | 5.9E-02 *   |
| Q99J86                                        | attractin (ATRN)                                                                | 3.0E-02 *   |
| Q2IBD4-2                                      | cortactin binding protein 2 (CTTNBP2)                                           | 1.6E-02 *   |
| D3Z9H2                                        | hyaluronan and proteoglycan link protein 4 (HAPLN4)                             | 1.7E-03 **  |
| <b><i>cell adhesion</i></b>                   |                                                                                 |             |
| G3V7W5                                        | cadherin 20 (CDH20)                                                             | 4.1E-02 *   |
| Q2KN99                                        | sperm antigen with calponin homology and coiled-coil domains 1 like (SPECC1L)   | 2.1E-02 *   |
| B4F773                                        | tweety family member 1 (TTYH1)                                                  | 4.4E-02 *   |
| <b><i>cell junction</i></b>                   |                                                                                 |             |
| F7EYW4                                        | cell adhesion molecule 1 (CADM1)                                                | 1.9E-02 *   |
| P32577                                        | c-src tyrosine kinase (CSK)                                                     | 3.2E-02 *   |
| Q5U302                                        | catenin alpha 1 (CTNNA1)                                                        | 4.5E-02 *   |
| P08050                                        | gap junction protein alpha 1 (GJA1)                                             | 6.9E-04 *** |
| E9PSV8                                        | glycoprotein m6b (GPM6B)                                                        | 3.9E-03 **  |
| P34901                                        | syndecan 4 (SDC4)                                                               | 7.2E-03 **  |

|                                               |                                                                         |         |     |
|-----------------------------------------------|-------------------------------------------------------------------------|---------|-----|
| G3V6L8                                        | striatin (STRN)                                                         | 4.6E-02 | *   |
| A0A0G2K2P5                                    | tight junction protein 1 (TJP1)                                         | 4.7E-02 | *   |
| B2RYG8                                        | elongator acetyltransferase complex subunit 6 (ELP6)                    | 9.7E-03 | **  |
| <b>differentiation</b>                        |                                                                         |         |     |
| F1M7X4                                        | erb-b2 receptor tyrosine kinase 4 (ERBB4)                               | 3.3E-02 | *   |
| B1WC24                                        | CTD small phosphatase 1 (CTDSP1)                                        | 2.5E-02 | *   |
| Q9Z0G8                                        | WAS/WASL interacting protein family member 3 (WIPF3)                    | 9.2E-03 | **  |
| A0A0G2JUX5                                    | purine rich element binding protein B (PURB)                            | 1.7E-02 | **  |
| F1M987                                        | signal peptide, CUB domain and EGF like domain containing 1 (SCUBE1)    | 3.2E-02 | *   |
| <b>dopamine response</b>                      |                                                                         |         |     |
| G3V6I2                                        | adenylate cyclase 3 (ADCY3)                                             | 1.8E-02 | *   |
| A0A0G2JXK1                                    | calcium voltage-gated channel subunit alpha1 A (CACNA1A)                | 1.6E-02 | *   |
| P63095                                        | GNAS complex locus (GNAS)                                               | 4.6E-02 | *   |
| Q62648                                        | glutamate ionotropic receptor NMDA type subunit 1 (GRIN1)               | 4.6E-02 | *   |
| P63142                                        | potassium voltage-gated channel subfamily A member 2 (KCNA2)            | 4.0E-02 | *   |
| P70673                                        | potassium voltage-gated channel subfamily J member 11 (KCNJ11)          | 3.8E-02 | *   |
| P52188                                        | potassium voltage-gated channel subfamily J member 12 (KCNJ12)          | 4.2E-02 | *   |
| G3V9M7                                        | potassium voltage-gated channel subfamily J member 4 (KCNJ4)            | 2.1E-02 | *   |
| P23977                                        | solute carrier family 6 member 3 (SLC6A3)                               | 4.6E-02 | *   |
| A0A0G2JYY3                                    | tyrosine kinase non receptor 2 (TNK2)                                   | 3.6E-02 | *   |
| <b>ER to Golgi vesicle-mediated transport</b> |                                                                         |         |     |
| Q5XHZ8                                        | component of oligomeric golgi complex 3 (COG3)                          | 4.7E-02 | *   |
| Q99M64                                        | phosphatidylinositol 4-kinase type 2 alpha (PI4K2A)                     | 3.6E-02 | *   |
| Q9Z158                                        | syntaxin 17 (STX17)                                                     | 7.0E-03 | **  |
| Q6AZ42                                        | gap junction protein beta 6 (GJB6)                                      | 2.8E-02 | *   |
| D3ZD84                                        | leucine rich repeats and immunoglobulin like domains 1 (LRIG1)          | 3.8E-02 | *   |
| <b>ion transport, other</b>                   |                                                                         |         |     |
| P60571                                        | pannexin 2 (PANX2)                                                      | 3.2E-02 | *   |
| A0A0H2UHA7                                    | solute carrier family 15 member 2 (SLC15A2)                             | 4.3E-02 | *   |
| D4A517                                        | solute carrier family 39 member 10 (SLC39A10)                           | 2.1E-02 | *   |
| D3ZZM0                                        | solute carrier family 39 member 14 (SLC39A14)                           | 4.0E-02 | *   |
| <b>lipid-related processes</b>                |                                                                         |         |     |
| MORA83                                        | ATP binding cassette subfamily A member 5 (ABCA5)                       | 2.3E-02 | *   |
| Q5PQS4                                        | GULP, engulfment adaptor PTB domain containing 1 (GULP1)                | 4.9E-02 | *   |
| Q5BK77                                        | retinoic acid receptor responder 2 (RARRES2)                            | 4.3E-02 | *   |
| Q99MS0                                        | SEC14 like lipid binding 2 (SEC14L2)                                    | 8.1E-04 | *** |
| P58405-2                                      | striatin 3 (STRN3)                                                      | 7.7E-02 | *   |
| F1LNL3                                        | ATP binding cassette subfamily A member 1 (ABCA1)                       | 2.9E-04 | *** |
| B0BMW2                                        | hydroxysteroid 17-beta dehydrogenase 10 (HSD17B10)                      | 3.9E-02 | *   |
| P04276                                        | GC, vitamin D binding protein (GC)                                      | 1.4E-02 | *   |
| <b>localization to plasma membrane</b>        |                                                                         |         |     |
| P97846                                        | contactin associated protein 1 (CNTNAP1)                                | 5.1E-02 | *   |
| F1LTW9                                        | EFR3 homolog B (EFR3B)                                                  | 5.4E-02 | *   |
| F1M8X9                                        | golgi brefeldin A resistant guanine nucleotide exchange factor 1 (GBF1) | 4.6E-02 | *   |
| A0A0A0MY13                                    | G protein-coupled receptor 158 (GPR158)                                 | 1.9E-02 | *   |
| D3ZII1                                        | raftlin family member 2 (RFTN2)                                         | 4.2E-03 | **  |
| Q99PV2                                        | syntaxin binding protein 3 (STXBP3)                                     | 2.8E-02 | *   |
| <b>metabolism</b>                             |                                                                         |         |     |
| G3V7H6                                        | arginase 2 (ARG2)                                                       | 2.8E-02 | *   |
| Q5U2N0                                        | CTP synthase 2 (CTPS2)                                                  | 1.7E-02 | *   |
| P15429                                        | enolase 3 (ENO3)                                                        | 4.7E-02 | *   |
| P84039                                        | ectonucleotide pyrophosphatase/phosphodiesterase 5 (putative) (ENPP5)   | 4.0E-02 | *   |
| Q5PPI4                                        | lysosomal associated membrane protein family member 5 (LAMP5)           | 4.9E-02 | *   |
| D4A197                                        | methylmalonyl-CoA epimerase (MCEE)                                      | 3.8E-02 | *   |
| F1M5N4                                        | malic enzyme 3 (ME3)                                                    | 1.7E-02 | *   |



|                                                             |                                                                              |         |      |
|-------------------------------------------------------------|------------------------------------------------------------------------------|---------|------|
| D3ZKY0                                                      | N-terminal EF-hand calcium binding protein 3 (NECAB3)                        | 4.3E-02 | *    |
| Q99PW5                                                      | neuraminidase 3 (NEU3)                                                       | 1.1E-02 | *    |
| F7F588                                                      | nicotinamide nucleotide adenyltransferase 3 (NMNAT3)                         | 5.9E-03 | **   |
| Q66H59                                                      | N-acetylneuraminase pyruvate lyase (NPL)                                     | 3.7E-03 | **   |
| E9PTV9                                                      | similar to glyceraldehyde-3-phosphate dehydrogenase (RGD1562758)             | 6.4E-03 | **   |
| F1M0M3                                                      | UEV and lactate/malate dehydrogenase domains (UEVLD)                         | 4.9E-02 | *    |
| D4A7Z0                                                      | WD and tetratricopeptide repeats 1 (WDTC1)                                   | 3.6E-02 | *    |
| <b>microtubule organization</b>                             |                                                                              |         |      |
| Q78P75                                                      | dynein light chain LC8-type 2 (DYNLL2)                                       | 1.8E-02 | *    |
| P34926                                                      | microtubule associated protein 1A (MAP1A)                                    | 9.8E-03 | *    |
| Q4QQR9                                                      | mediator of cell motility 1 (MEMO1)                                          | 5.3E-02 | *    |
| A0A0G2K4U7                                                  | microtubule associated tumor suppressor candidate 2 (MTUS2)                  | 2.8E-02 | *    |
| D3ZMY8                                                      | pericentrin (PCNT)                                                           | 2.4E-03 | **   |
| D3Z7Z5                                                      | RAN binding protein 10 (RANBP10)                                             | 3.5E-02 | *    |
| <b>migration</b>                                            |                                                                              |         |      |
| Q66HC5                                                      | nucleoporin 93 (NUP93)                                                       | 4.5E-02 | *    |
| <b>mitochondrial processes</b>                              |                                                                              |         |      |
| Q68FT1                                                      | coenzyme Q9 (COQ9)                                                           | 4.4E-02 | *    |
| M0R4L6                                                      | glutamyl-tRNA amidotransferase subunit B (GATB)                              | 4.9E-02 | *    |
| P27881                                                      | hexokinase 2 (HK2)                                                           | 1.9E-02 | *    |
| M0RDC8                                                      | mitochondrial translation release factor 1 (MTRF1)                           | 2.7E-03 | **   |
| Q5M7W7                                                      | prolyl-tRNA synthetase 2, mitochondrial (putative) (PARS2)                   | 3.1E-02 | *    |
| G3V7I0                                                      | peroxiredoxin 3 (PRDX3)                                                      | 2.7E-02 | *    |
| Q6TUF2                                                      | succinate dehydrogenase complex assembly factor 3 (SDHAF3)                   | 2.7E-02 | *    |
| Q9R0E0                                                      | UDP-glucose ceramide glucosyltransferase (UGCG)                              | 5.1E-02 | *    |
| Q6AY19                                                      | coenzyme Q8B (COQ8B)                                                         | 3.9E-02 | *    |
| <b>neuron projection development</b>                        |                                                                              |         |      |
| B2RYJ1                                                      | anaphase promoting complex subunit 2 (ANAPC2)                                | 3.1E-02 | *    |
| A0A0G2K5J4                                                  | cyclin dependent kinase like 3 (CDKL3)                                       | 4.8E-03 | **   |
| Q9NRI5                                                      | disrupted in schizophrenia 1 (DISC1)                                         | 7.9E-13 | **** |
| A0A0G2JUE4                                                  | golgin A4 (GOLGA4)                                                           | 4.2E-02 | *    |
| D3ZQM3                                                      | integrin subunit alpha 3 (ITGA3)                                             | 4.6E-02 | *    |
| G3V881                                                      | leucine rich repeat and Ig domain containing 1 (LINGO1)                      | 5.2E-03 | **   |
| A0A0G2JWA8                                                  | microtubule-actin crosslinking factor 1 (MACF1)                              | 2.1E-02 | *    |
| O88382                                                      | membrane associated guanylate kinase, WW and PDZ domain containing 2 (MAGI2) | 4.0E-02 | *    |
| Q78PB6                                                      | nudE neurodevelopment protein 1 like 1 (NDEL1)                               | 1.9E-02 | *    |
| A0A0G2JTW1                                                  | RAP2A, member of RAS oncogene family (RAP2A)                                 | 2.3E-02 | *    |
| A0A0G2JZA1                                                  | roundabout guidance receptor 2 (ROBO2)                                       | 2.7E-02 | *    |
| B2GUZ6                                                      | reticulon 4 interacting protein 1 (RTN4IP1)                                  | 4.4E-02 | *    |
| Q00954                                                      | sodium voltage-gated channel beta subunit 1 (SCN1B)                          | 2.0E-02 | *    |
| D3ZQP6                                                      | semaphorin 7A (SEMA7A)                                                       | 4.0E-02 | *    |
| F1LXV3                                                      | serine/threonine kinase 26 (STK26)                                           | 2.1E-02 | *    |
| A0A0G2JSR2                                                  | synaptotagmin 3 (SYT3)                                                       | 1.2E-02 | *    |
| <b>neurotransmitter metabolism, secretion and signaling</b> |                                                                              |         |      |
| D3Z890                                                      | diacylglycerol lipase beta (DAGLB)                                           | 4.6E-04 | ***  |
| F1MAB7                                                      | diacylglycerol kinase iota (DGKI)                                            | 5.1E-02 | *    |
| P63170                                                      | dynein light chain LC8-type 1 (DYNLL1)                                       | 3.3E-02 | *    |
| P09606                                                      | glutamate-ammonia ligase (GLUL)                                              | 1.8E-02 | *    |
| Q9JHZ4                                                      | GRIP1 associated protein 1 (GRIPAP1)                                         | 7.0E-03 | **   |
| D3ZK93                                                      | GSG1 like (GSG1L)                                                            | 7.9E-03 | **   |
| O54960                                                      | nitric oxide synthase 1 (neuronal) adaptor protein (NOS1AP)                  | 3.4E-02 | *    |
| Q9JIR4                                                      | regulating synaptic membrane exocytosis 1 (RIMS1)                            | 3.2E-02 | *    |
| D3ZWS6                                                      | N(alpha)-acetyltransferase 30, NatC catalytic subunit (NAA30)                | 3.0E-02 | *    |
| Q5XIS7                                                      | ubiquitin associated protein 1 (UBAP1)                                       | 2.9E-02 | *    |
| <b>potassium ion transmembrane transport</b>                |                                                                              |         |      |
| P10499                                                      | potassium voltage-gated channel subfamily A member 1 (KCNA1)                 | 6.0E-03 | **   |

## Supplementary Material

|                              |                                                                                      |         |     |
|------------------------------|--------------------------------------------------------------------------------------|---------|-----|
| P63144                       | potassium voltage-gated channel subfamily A member regulatory beta subunit 1 (KCNA1) | 1.8E-02 | *   |
| P62483                       | potassium voltage-gated channel subfamily A regulatory beta subunit 2 (KCNA2)        | 2.9E-02 | *   |
| A0A0G2K104                   | potassium calcium-activated channel subfamily M alpha 1 (KCNA1)                      | 9.4E-03 | **  |
| G3V6N7                       | solute carrier family 12 member 6 (SLC12A6)                                          | 1.1E-02 | *   |
| <b>signal transduction</b>   |                                                                                      |         |     |
| F1M4N6                       | dedicator of cytokinesis 3 (DOCK3)                                                   | 1.3E-02 | *   |
| F1LYG2                       | signal-induced proliferation-associated 1 like 3 (SIPA1L3)                           | 3.1E-02 | *   |
| A0A0G2K2B9                   | ankyrin 3 (ANK3)                                                                     | 5.1E-02 | *   |
| D3ZGL1                       | Rho GTPase activating protein 25 (ARHGAP25)                                          | 4.4E-02 | *   |
| D3ZKB4                       | Rho guanine nucleotide exchange factor 4 (ARHGEF4)                                   | 1.1E-02 | *   |
| Q64542-2                     | ATPase plasma membrane Ca <sup>2+</sup> transporting 4 (ATP2B4)                      | 4.6E-02 | *   |
| D4A758                       | leucine rich repeat containing 8 family member B (LRRC8B)                            | 4.9E-02 | *   |
| Q6AYR2                       | NDRG family member 3 (NDRG3)                                                         | 5.2E-02 | *   |
| F1LQ26                       | Rap guanine nucleotide exchange factor 4 (RAPGEF4)                                   | 2.0E-02 | *   |
| A0A0G2JTA7                   | RAS protein activator like 2 (RASAL2)                                                | 3.8E-02 | *   |
| D4AB55                       | regulator of G-protein signaling 12 (RGS12)                                          | 1.7E-02 | *   |
| F1M3P6                       | suppressor of cancer cell invasion (SCAI)                                            | 4.1E-02 | *   |
| Q8R424                       | STAM binding protein (STAMPB)                                                        | 4.7E-03 | **  |
| <b>sodium ion transport</b>  |                                                                                      |         |     |
| Q62962                       | acid sensing ion channel subunit 2 (ASIC2)                                           | 2.5E-02 | *   |
| P04775                       | sodium voltage-gated channel alpha subunit 2 (SCN2A)                                 | 1.7E-02 | *   |
| Q9JJP0                       | solute carrier family 20 member 1 (SLC20A1)                                          | 3.8E-03 | **  |
| Q9JHE5                       | solute carrier family 38 member 2 (SLC38A2)                                          | 1.7E-02 | *   |
| P23347                       | solute carrier family 4 member 2 (SLC4A2)                                            | 2.5E-02 | *   |
| G3V8P8                       | solute carrier family 4 member 3 (SLC4A3)                                            | 4.9E-04 | *** |
| Q9JI66-3                     | solute carrier family 4 member 4 (SLC4A4)                                            | 3.2E-02 | *   |
| D3ZEE4                       | plexin domain containing 1 (PLXDC1)                                                  | 2.5E-02 | *   |
| <b>synaptic organization</b> |                                                                                      |         |     |
| MOR752                       | leucine rich repeat and Ig domain containing 2 (LINGO2)                              | 2.1E-02 | *   |
| D3ZLC1                       | lamin B2 (LMNB2)                                                                     | 3.7E-02 | *   |
| Q45R42                       | leucine rich repeat containing 4 (LRRC4)                                             | 3.4E-02 | *   |
| D3ZNW5                       | neurofascin (NFASC)                                                                  | 9.1E-03 | **  |
| F1M4R7                       | chondroitin sulfate proteoglycan 5 (CSPG5)                                           | 2.1E-02 | *   |
| D4A2L1                       | RIMS binding protein 2 (RIMBP2)                                                      | 3.3E-02 | *   |
| <b>transcription</b>         |                                                                                      |         |     |
| D3Z941                       | methionyl-tRNA synthetase (MARS)                                                     | 4.7E-02 | *   |
| A0A0G2K1A1                   | zinc finger protein 706 (ZFP706)                                                     | 2.6E-02 | *   |
| <b>translation</b>           |                                                                                      |         |     |
| A9CMB7                       | aspartyl-tRNA synthetase (DARS)                                                      | 3.9E-02 | *   |
| Q68G14                       | DEAD-box helicase 25 (DDX25)                                                         | 2.2E-04 | *** |
| F7EPZ4                       | DIS3 homolog, exosome endoribonuclease and 3'-5' exoribonuclease (DIS3)              | 4.7E-02 | *   |
| Q4G061                       | eukaryotic translation initiation factor 3 subunit B (EIF3B)                         | 1.2E-02 | *   |
| Q5RKI9                       | mitochondrial ribosome recycling factor (MRRF)                                       | 2.6E-02 | *   |
| D3ZQL8                       | pumilio RNA binding family member 2 (PUM2)                                           | 3.1E-02 | *   |
| P38983                       | ribosomal protein SA (RPSA)                                                          | 4.9E-03 | **  |
| Q09167                       | serine/arginine-rich splicing factor 5 (SRSF5)                                       | 9.7E-03 | **  |
| F1M8H2                       | tryptophanyl tRNA synthetase 2, mitochondrial (WARS2)                                | 3.9E-02 | *   |
| Q4V8I7                       | leucine rich repeat containing 8 family member A (LRRC8A)                            | 2.2E-03 | **  |
| D3ZGN0                       | TBC1 domain family member 4 (TBC1D4)                                                 | 6.9E-03 | **  |
| D3ZE59                       | transmembrane protein 115 (TMEM115)                                                  | 9.7E-04 | *** |
| G3V6K1                       | transcobalamin 2 (TCN2)                                                              | 1.0E-02 | **  |
| Q66H62                       | CYLD lysine 63 deubiquitinase (CYLD)                                                 | 3.3E-02 | *   |
| D4A0M2                       | nucleoredoxin (NXN)                                                                  | 2.1E-02 | *   |
| B5DEL1                       | potassium channel tetramerization domain containing 5 (KCTD5)                        | 2.6E-02 | *   |
| F1LQN1                       | polypeptide N-acetylgalactosaminyltransferase 16 (GALNT16)                           | 2.5E-02 | *   |

**apoptosis**

|            |                                                              |         |      |
|------------|--------------------------------------------------------------|---------|------|
| D4AA14     | apoptosis inducing factor, mitochondria associated 2 (AIFM2) | 3.9E-02 | *    |
| A0A0G2K427 | influenza virus NS1A binding protein (IVNS1ABP)              | 3.0E-02 | *    |
| Q91XT9     | N-acylsphingosine amidohydrolase 2 (ASAH2)                   | 3.9E-02 | *    |
| Q5FWU3     | autophagy related 9A (ATG9A)                                 | 1.6E-05 | **** |

**others**

|            |                                                                           |         |    |
|------------|---------------------------------------------------------------------------|---------|----|
| Q5XIJ5     | abhydrolase domain containing 17A (ABHD17A)                               | 2.1E-02 | *  |
| Q6AY72     | chromosome 19 open reading frame 25 (C19ORF25)                            | 1.2E-02 | *  |
| D3ZV63     | chromosome 1 open reading frame 27 (C1ORF27)                              | 9.6E-03 | ** |
| Q498D0     | coiled-coil domain containing 28A (CCDC28A)                               | 3.1E-02 | *  |
| G3V674     | claudin domain containing 1 (CLDND1)                                      | 5.1E-03 | ** |
| M0RAD5     | caseinolytic mitochondrial matrix peptidase proteolytic subunit (CLPP)    | 3.9E-02 | *  |
| D4A1C0     | cyclin and CBS domain divalent metal cation transport mediator 1 (CNNM1)  | 3.2E-02 | *  |
| Q499V0     | COMM domain containing 7 (COMMD7)                                         | 3.4E-02 | *  |
| P48675     | desmin (DES)                                                              | 3.9E-02 | *  |
| B2RYA8     | DnaJ heat shock protein family (Hsp40) member B2 (DNAJB2)                 | 2.8E-02 | *  |
| G3V7G9     | eukaryotic translation initiation factor 3, subunit L (EIF3L)             | 1.2E-02 | *  |
| Q80Z26     | ectonucleoside triphosphate diphosphohydrolase 3 (ENTPD3)                 | 4.7E-02 | *  |
| M0RAC2     | family with sequence similarity 102 member A (FAM102A)                    | 3.5E-02 | *  |
| D4A1T7     | family with sequence similarity 173 member A (FAM173A)                    | 4.3E-03 | ** |
| M0RDY2     | family with sequence similarity 185 member A (FAM185A)                    | 2.1E-02 | *  |
| Q7TP54     | family with sequence similarity 65 member B (FAM65B)                      | 4.0E-03 | ** |
| B2RYH5     | interleukin 1 receptor associated kinase 1 (IRAK1)                        | 3.3E-02 | *  |
| Q1EG90     | kelch like family member 5 (KLHL5)                                        | 3.7E-02 | *  |
| Q561R9     | lactamase beta 2 (LACTB2)                                                 | 1.6E-02 | *  |
| D3ZW19     | leucine rich repeat and Ig domain containing 3 (LINGO3)                   | 2.1E-02 | *  |
| P05544     | Serine protease inhibitor (LOC299282)                                     | 5.7E-02 | *  |
| A0A096MK47 | muscular LMNA interacting protein (MLIP)                                  | 2.7E-02 | *  |
| B1H218     | NIMA related kinase 6 (NEK6)                                              | 3.9E-02 | *  |
| A0A0G2JUP0 | NIMA related kinase 7 (NEK7)                                              | 2.2E-02 | *  |
| D4A478     | nucleoside-triphosphatase, cancer-related (NTPCR)                         | 2.0E-02 | *  |
| G3V834     | proline rich coiled-coil 1 (PRRC1)                                        | 2.7E-02 | *  |
| D4A9R4     | proline rich transmembrane protein 4 (PRRT4)                              | 4.2E-02 | *  |
| Q66H61     | glutamyl-tRNA synthetase (QARS)                                           | 1.5E-02 | *  |
| B5DFB2     | RB binding protein 4, chromatin remodeling factor (RBBP4)                 | 1.5E-02 | *  |
| D4AAW6     | rhomboid like 3 (RHBDL3)                                                  | 4.6E-02 | *  |
| D3ZAB6     | ring finger protein 219 (RNF219)                                          | 1.1E-02 | *  |
| M0RCV5     | RUN and SH3 domain containing 2 (RUSC2)                                   | 1.9E-02 | *  |
| A0A0G2JSK1 | serine (or cysteine) proteinase inhibitor, clade A, member 3C (SERPINA3C) | 4.1E-02 | *  |
| Q499T3     | signal regulatory protein alpha (SIRPA)                                   | 2.8E-02 | *  |
| G3V702     | DNA replication regulator and spliceosomal factor (SMU1)                  | 3.2E-02 | *  |
| D4A9H7     | spermatogenesis associated 2 like (SPATA2L)                               | 1.3E-02 | *  |
| D3ZF92     | TNF receptor superfamily member 21 (TNFRSF21)                             | 2.7E-02 | *  |

**Supplementary Table S3.** Cellular components of the proteins altered by DISC1 overexpression. Enrichment of GO annotations were performed on the significant proteins using GOA database (v30.08.2017) using the ClueGO via the Cytoscape platform (Benjamini–Hochberg P-value  $<10^{-3}$ )

| GO ID      | GO Term                                 | P-value  | Associated Proteins Found                                                                                                |
|------------|-----------------------------------------|----------|--------------------------------------------------------------------------------------------------------------------------|
| GO:0043197 | dendritic spine                         | 3.70E-03 | ASIC2, CACNA1A, CTTNBP2, GRIN1, LRRC4, STRN                                                                              |
| GO:0045121 | membrane raft                           | 3.80E-04 | ABCA1, ATP2B4, CSK, CTNNA1, DYNLL1, GJA1, GPM6B, KCNMA1, NOS1AP, PI4K2A, RFTN2, SDC4, SLC6A3                             |
| GO:0005901 | caveola                                 | 1.50E-03 | ATP2B4, CTNNA1, DYNLL1, KCNMA1, NOS1AP, SLC6A3                                                                           |
| GO:0009898 | cytoplasmic side of plasma membrane     | 2.50E-03 | CSK, CYLD, GNAS, GNAZ, KCNAB1, KCNAB2, RASAL2, TNK2                                                                      |
| GO:0019897 | extrinsic component of plasma membrane  | 1.70E-04 | ANAPC2, CSK, CTNNA1, CYLD, GNAS, GNAZ, KCNAB1, KCNAB2, SCUBE1, TNK2                                                      |
| GO:0014704 | intercalated disc                       | 6.00E-05 | CTNNA1, DES, GJA1, KCNJ11, SCN1B, SCN2A, TJP1                                                                            |
| GO:0042383 | sarcolemma                              | 4.30E-04 | ADRA1A, ATP2B4, DES, KCNJ11, NOS1AP, SCN1B, SCN2A, SLC38A2                                                               |
| GO:0030315 | T-tubule                                | 1.50E-04 | ADRA1A, ATP2B4, KCNJ11, NOS1AP, SCN1B, SCN2A                                                                             |
| GO:0031252 | cell leading edge                       | 8.00E-05 | ANAPC2, ARHGEF4, CACNA1A, CTNNA1, DYNLL1, GBF1, GNAS, KCNA2, KCNJ11, LAMP5, MACF1, NDEL1, PIK3CA, ROBO2, ROCK1, SLC39A14 |
| GO:0031256 | leading edge membrane                   | 4.00E-04 | ANAPC2, ARHGEF4, CACNA1A, DYNLL1, KCNA2, KCNJ11, LAMP5, MACF1, ROBO2                                                     |
| GO:0032589 | neuron projection membrane              | 1.80E-03 | CACNA1A, KCNJ11, LAMP5, ROBO2                                                                                            |
| GO:0033267 | axon part                               | 1.60E-04 | GRIN1, KCNA1, KCNA2, KCNAB1, KCNAB2, KCNJ11, NDEL1, NFASC, ROBO2, SCN1B, SCN2A                                           |
| GO:0034702 | ion channel complex                     | 1.10E-05 | CACNA1A, GRIN1, KCNA1, KCNA2, KCNAB1, KCNAB2, KCNJ11, KCNJ4, KCNMA1, LRRC8A, LRRC8B, NOS1AP, SCN1B, SCN2A, TTYH1         |
| GO:0034703 | cation channel complex                  | 5.30E-05 | CACNA1A, GRIN1, KCNA1, KCNA2, KCNAB1, KCNAB2, KCNJ11, KCNJ4, KCNMA1, NOS1AP, SCN1B, SCN2A                                |
| GO:0044304 | main axon                               | 1.00E-06 | KCNA1, KCNA2, KCNAB1, KCNAB2, KCNJ11, NFASC, ROBO2, SCN1B, SCN2A                                                         |
| GO:0008076 | voltage-gated potassium channel complex | 8.30E-05 | KCNA1, KCNA2, KCNAB1, KCNAB2, KCNJ11, KCNJ4, KCNMA1, NOS1AP                                                              |
| GO:0033268 | node of Ranvier                         | 2.00E-03 | NFASC, SCN1B, SCN2A                                                                                                      |
| GO:0033270 | paranode region of axon                 | 1.20E-03 | KCNA1, NFASC, SCN2A                                                                                                      |
| GO:0044224 | juxtaparanode region of axon            | 8.70E-05 | KCNA1, KCNA2, KCNAB1, KCNAB2                                                                                             |

**Supplementary Table S4.** Molecular Function of the proteins altered by DISC1 overexpression. Enrichment of GO annotations were performed on the significant proteins using GOA database (v30.08.2017) using the ClueGO via the Cytoscape platform (Benjamini–Hochberg P-value <10<sup>-3</sup>)

| GO ID      | GO Term                                                        | P-Value  | Associated Genes Found                                                                                                                                                                         |
|------------|----------------------------------------------------------------|----------|------------------------------------------------------------------------------------------------------------------------------------------------------------------------------------------------|
| GO:0004812 | aminoacyl-tRNA ligase activity                                 | 7.80E-05 | DARS, MARS, PARS2, QARS, SRSF5, WARS2                                                                                                                                                          |
| GO:0015293 | symporter activity                                             | 9.70E-05 | SLC12A6, SLC15A2, SLC20A1, SLC38A2, SLC4A10, SLC4A2, SLC4A3, SLC4A4, SLC6A3                                                                                                                    |
| GO:0005452 | inorganic anion exchanger activity                             | 2.30E-04 | SLC4A10, SLC4A2, SLC4A3, SLC4A4                                                                                                                                                                |
| GO:0015301 | anion:anion antiporter activity                                | 6.80E-04 | SLC4A10, SLC4A2, SLC4A3, SLC4A4                                                                                                                                                                |
| GO:0015077 | monovalent inorganic cation transmembrane transporter activity | 2.40E-06 | ASIC2, KCNA1, KCNA2, KCNAB1, KCNAB2, KCNJ11, KCNJ12, KCNJ4, KCNMA1, SCN1B, SCN2A, SLC12A6, SLC20A1, SLC4A10, SLC4A2, SLC4A3, SLC4A4, SLC6A3                                                    |
| GO:0008510 | sodium:bicarbonate symporter activity                          | 1.10E-05 | SLC4A10, SLC4A2, SLC4A3, SLC4A4                                                                                                                                                                |
| GO:0015081 | sodium ion transmembrane transporter activity                  | 1.60E-04 | ASIC2, SCN1B, SCN2A, SLC20A1, SLC4A10, SLC4A2, SLC4A3, SLC4A4, SLC6A3                                                                                                                          |
| GO:0005244 | voltage-gated ion channel activity                             | 1.20E-05 | CACNA1A, GRIN1, KCNA1, KCNA2, KCNAB1, KCNAB2, KCNJ11, KCNJ12, KCNJ4, KCNMA1, SCN1B, SCN2A                                                                                                      |
| GO:0005261 | cation channel activity                                        | 1.40E-04 | ASIC2, CACNA1A, GRIN1, KCNA1, KCNA2, KCNAB1, KCNAB2, KCNJ11, KCNJ12, KCNJ4, KCNMA1, SCN1B, SCN2A                                                                                               |
| GO:0015077 | monovalent inorganic cation transmembrane transporter activity | 2.40E-06 | ASIC2, KCNA1, KCNA2, KCNAB1, KCNAB2, KCNJ11, KCNJ12, KCNJ4, KCNMA1, SCN1B, SCN2A, SLC12A6, SLC20A1, SLC4A10, SLC4A2, SLC4A3, SLC4A4, SLC6A3                                                    |
| GO:0046873 | metal ion transmembrane transporter activity                   | 3.80E-09 | ASIC2, ATP2B4, CACNA1A, GRIN1, KCNA1, KCNA2, KCNAB1, KCNAB2, KCNJ11, KCNJ12, KCNJ4, KCNMA1, SCN1B, SCN2A, SLC12A6, SLC20A1, SLC39A10, SLC39A14, SLC4A10, SLC4A2, SLC4A3, SLC4A4, SLC6A3, TTYH1 |
| GO:0022843 | voltage-gated cation channel activity                          | 6.80E-05 | CACNA1A, KCNA1, KCNA2, KCNAB1, KCNAB2, KCNJ11, KCNJ12, KCNJ4, KCNMA1                                                                                                                           |
| GO:0015079 | potassium ion transmembrane transporter activity               | 1.60E-04 | KCNA1, KCNA2, KCNAB1, KCNAB2, KCNJ11, KCNJ12, KCNJ4, KCNMA1, SLC12A6                                                                                                                           |
| GO:0015081 | sodium ion transmembrane transporter activity                  | 1.60E-04 | ASIC2, SCN1B, SCN2A, SLC20A1, SLC4A10, SLC4A2, SLC4A3, SLC4A4, SLC6A3                                                                                                                          |

**Supplementary Table S5.** Predicted biological functions of the tgDISC1 regulated proteins as evaluated by IPA. The IPA regulation z-score algorithm was used to predict biological functions that are expected to be activated in tgDISC1 rats rather than in wildtype (positive z-score) according to own proteomics data (z-score ≥ 2; P ≤ 0.05). The z-scores take into account the directional effect of one protein on a process and the direction of change of molecules in the dataset.

| Functions                              | Diseases or Functions Annotation          | P-value  | Activation z-score | Proteins                                                                                                          |
|----------------------------------------|-------------------------------------------|----------|--------------------|-------------------------------------------------------------------------------------------------------------------|
| Cell death                             | cell death of cortical neurons            | 4.83E-02 | 2.21               | GRIN1, HK2, LINGO1, Nos1ap, PIK3CA, RAPGEF4                                                                       |
| Extension                              | extension of cellular protrusions         | 1.85E-03 | 2.79               | ANAPC2, CDKL3, DISC1, GOLGA4, GRIN1, NDEL1, SCN1B, SEMA7A                                                         |
| Extension                              | extension of neurites                     | 5.64E-03 | 2.61               | ANAPC2, CDKL3, DISC1, GOLGA4, NDEL1, SCN1B, SEMA7A                                                                |
| Extension                              | extension of axons                        | 3.78E-03 | 2.43               | ANAPC2, CDKL3, DISC1, GOLGA4, NDEL1, SEMA7A                                                                       |
| Long-term potentiation brain           | long-term potentiation of brain           | 1.37E-02 | 2.40               | ERBB4, GRIN1, HSD17B10, RAPGEF4, RIMS1, SLC6A3                                                                    |
| Long-term potentiation cerebral cortex | long-term potentiation of cerebral cortex | 3.08E-02 | 2.19               | ERBB4, GRIN1, HSD17B10, RAPGEF4, SLC6A3                                                                           |
| Quantity                               | quantity of cells                         | 9.54E-03 | 2.67               | ABCA1, ANK3, CACNA1A, DISC1, ENTPD3, ERBB4, FGFR3, GJA1, GJB6, GNAS, GRIN1, LMNB2, NFASC, RIMS1, SLC6A3, TNFRSF21 |
| Quantity                               | quantity of neurons                       | 1.62E-02 | 2.43               | ABCA1, ANK3, CACNA1A, DISC1, ENTPD3, ERBB4, FGFR3, GNAS, GRIN1, NFASC, RIMS1, SLC6A3                              |
